# Supplementary material for: In Situ Evaluation of Lipase Performances Through Dynamic Asymmetric Cyanohydrin Resolution
Source: Royal Society of Chemistry journal article supplement (doi:10.1039/c0ob00759e), 2010-12-20
Supplement: c0ob00759e.pdf [file c0ob00759e.pdf]

## Supporting information

### ***In Situ* Evaluation of Lipase Performances Through Dynamic Asymmetric Cyanohydrin Resolution**

Morakot Sakulsombat, Pornrapee Vongvilai and Olof Ramström\*

*KTH- Royal Institute of Technology, Department of Chemistry,  
Teknikringen 30, S-10044, Stockholm, Sweden.*

*Email: [ramstrom@kth.se](mailto:ramstrom@kth.se).*

#### **Table of contents**

|                                            |    |
|--------------------------------------------|----|
| Preference factors (Table S1)              | S2 |
| <sup>1</sup> H-NMR analyses (Figure S1)    | S3 |
| Chiral HPLC analyses (Figure S2)           | S6 |
| NMR spectra of ester products <b>4a-4e</b> | S7 |

## Preference factors ( $F_p$ )

**Table S1** Preference factors of ester products **4a-e** at different reaction conditions.

| Reaction condition                     | Preference factor of ester product                                                      |                                                                                         |                                                                                         |                                                                                           |                                                                                           |
|----------------------------------------|-----------------------------------------------------------------------------------------|-----------------------------------------------------------------------------------------|-----------------------------------------------------------------------------------------|-------------------------------------------------------------------------------------------|-------------------------------------------------------------------------------------------|
|                                        | <br>4a | <br>4b | <br>4c | <br>4d | <br>4e |
| 10 mg of lipase at RT                  | -0.42                                                                                   | 0.26                                                                                    | 0.20                                                                                    | 0.40                                                                                      | 0.30                                                                                      |
| 6 mg of lipase at RT                   | -0.63                                                                                   | 0.55                                                                                    | 0.15                                                                                    | 0.79                                                                                      | 0.59                                                                                      |
| 3 mg of lipase at RT                   | -0.66                                                                                   | 0.79                                                                                    | -0.03                                                                                   | 0.89                                                                                      | 0.63                                                                                      |
| 3 mg of lipase at 0°C                  | -0.72                                                                                   | 0.75                                                                                    | -0.03                                                                                   | 1.15                                                                                      | 0.28                                                                                      |
| 3 mg of lipase at -18°C <sup>[a]</sup> | -0.78                                                                                   | 0.83                                                                                    | -0.36                                                                                   | 1.68                                                                                      | 0.45                                                                                      |

<sup>[a]</sup> The lipase-mediated resolution of the dynamic cyanohydrin system at -18°C was slow and was stopped at <50% conversion.

## <sup>1</sup>H-NMR-analyses

### A. Dynamic cyanohydrin system at equilibrium

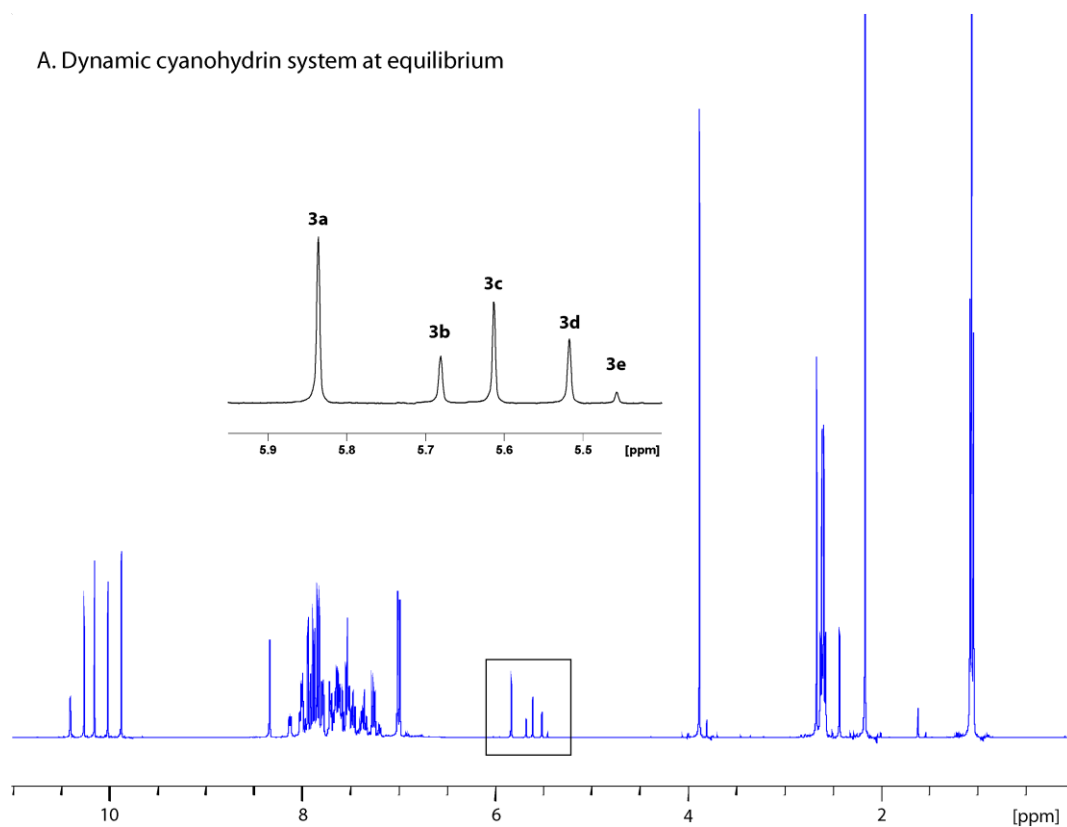

### B. Lipase-mediated resolution of ester products 4a-e using 10 mg of lipase PS-C-I was performed at room temperature

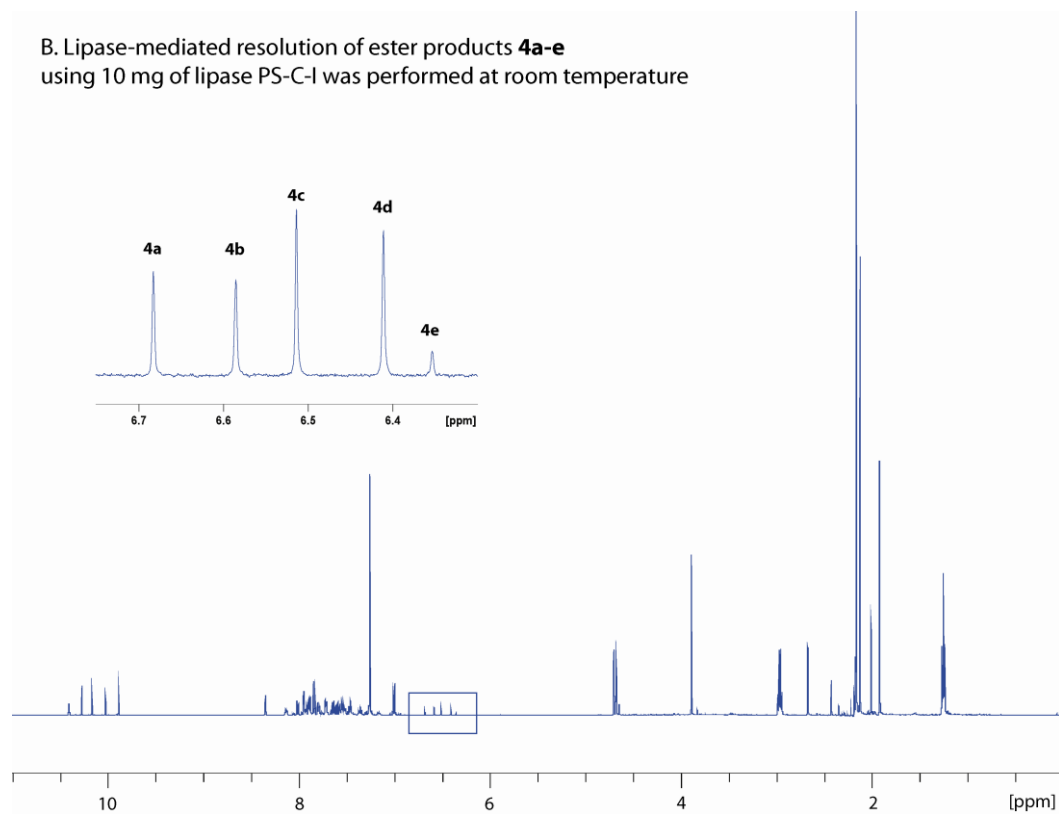

C. Lipase-mediated resolution of ester products **4a-e**  
using 6 mg of lipase PS-C-I was performed at room temperature

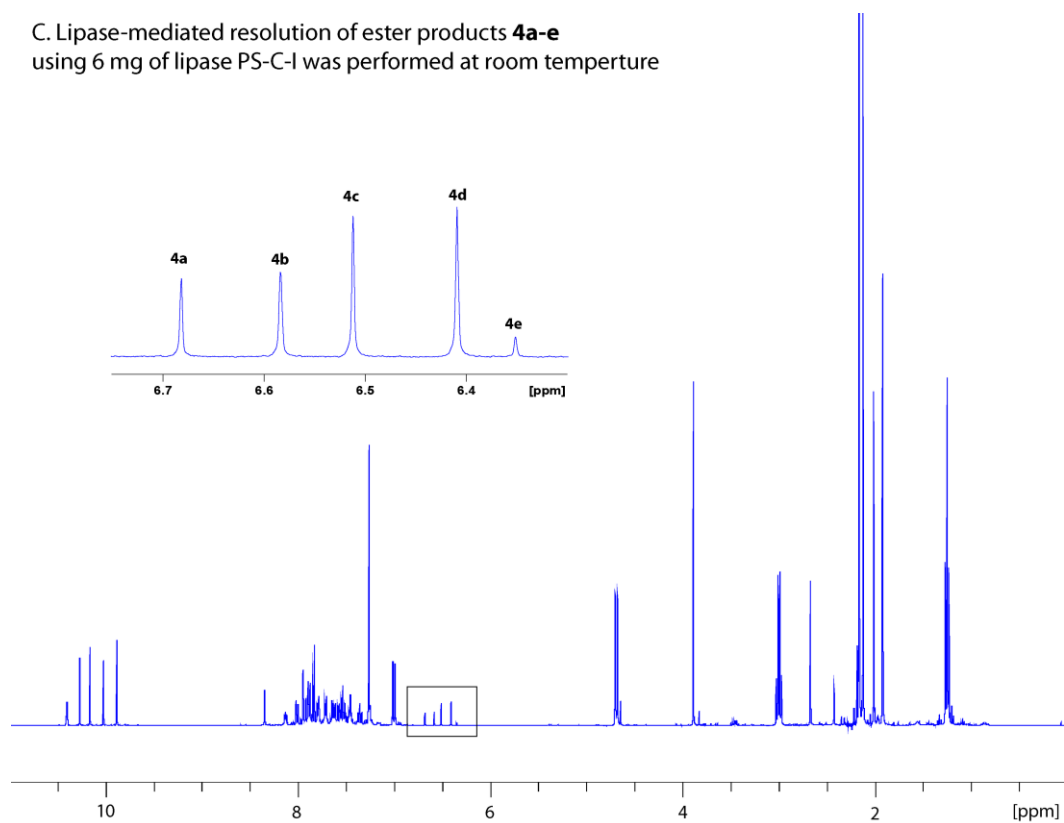

D. Lipase-mediated resolution of ester products **4a-e**  
using 3 mg of lipase PS-C-I was performed at room temperature

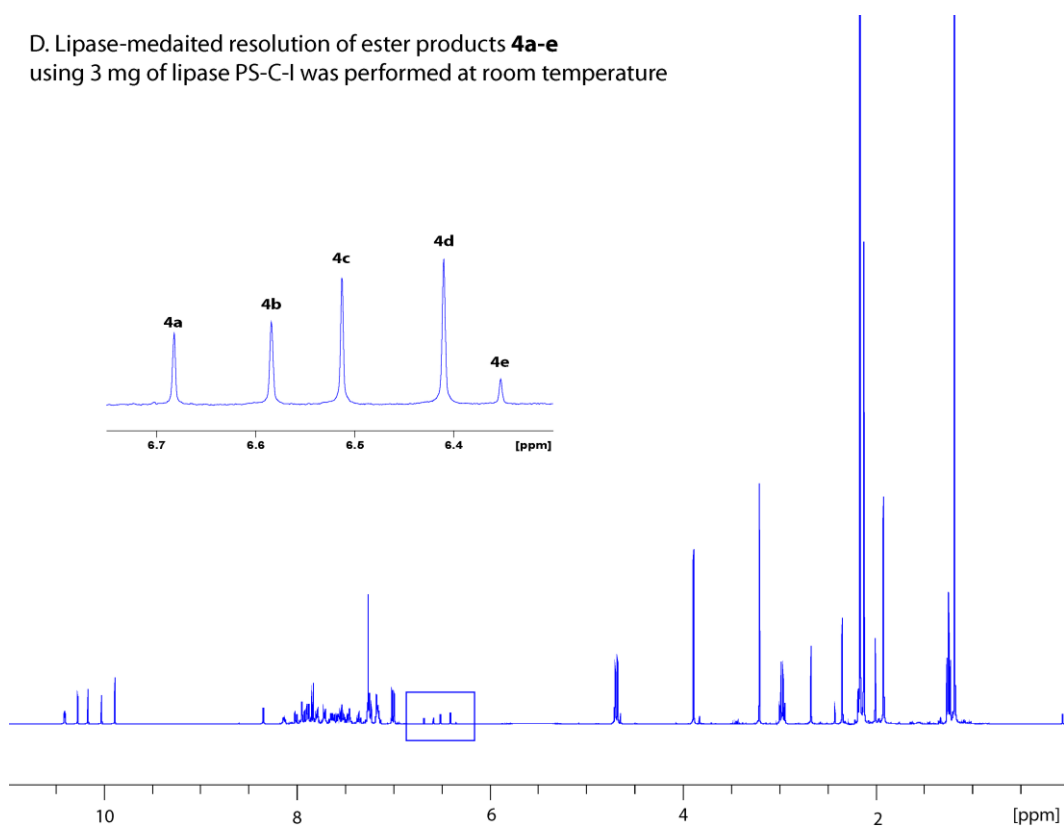

E. Lipase-mediated resolution of ester products **4a-e**  
using 3 mg of lipase PS-C-I was performed at 0°C

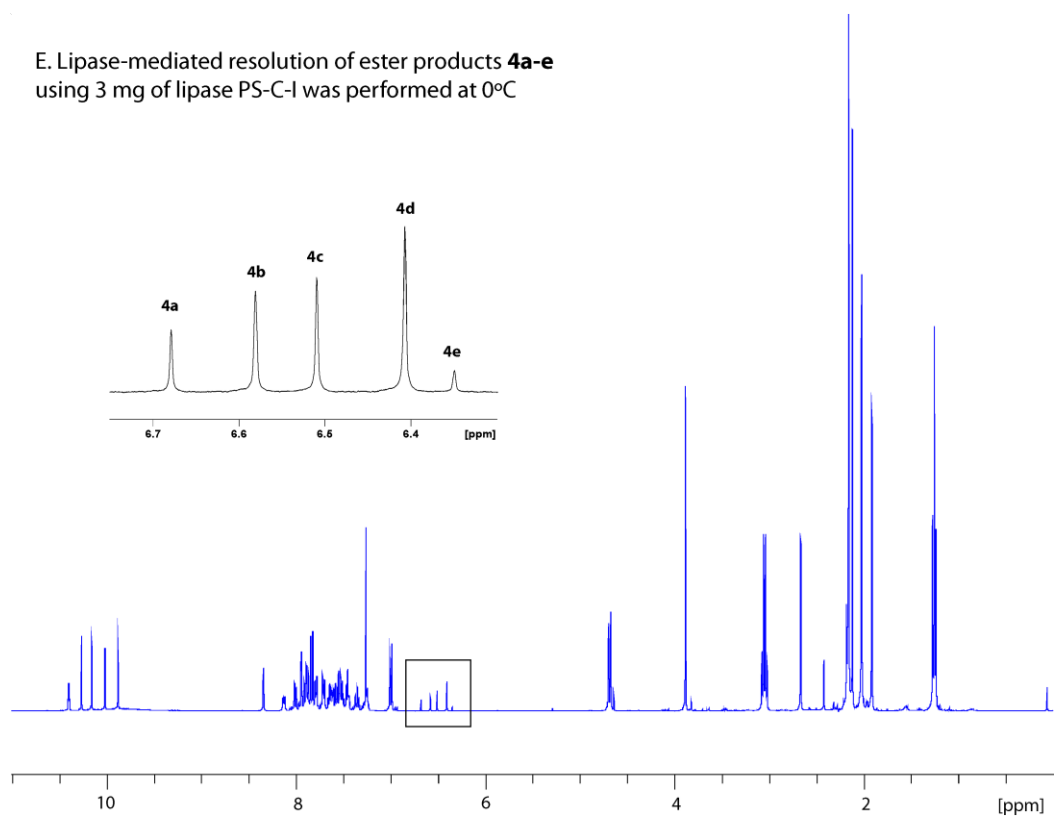

F. Lipase-mediated resolution of ester products **4a-e**  
using 3 mg of lipase PS-C-I at -18°C

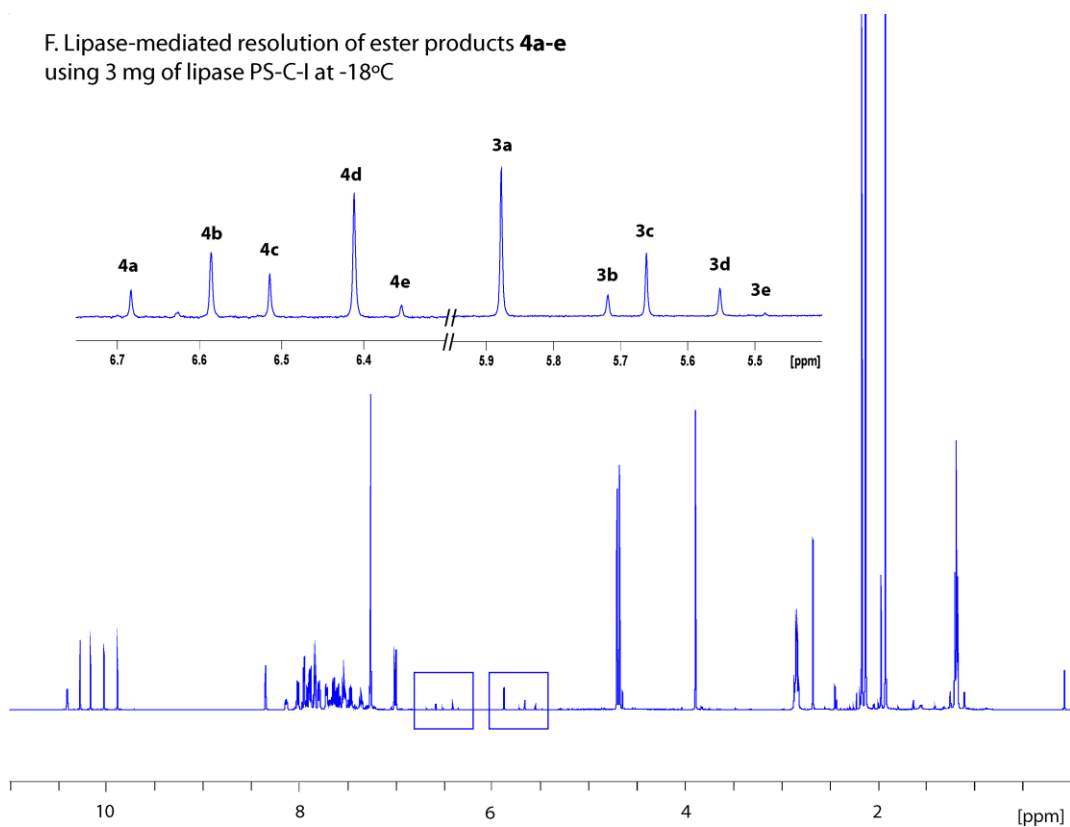

**Figure S1.** <sup>1</sup>H-NMR spectra of A. dynamic cyanohydrin intermediate at equilibrium; and lipase-mediated resolution using B. 10 mg of lipase at room temperature; C. 6 mg of lipase at room temperature; D. 3 mg of lipase at room temperature; E. 3 mg of lipase at 0°C; F. 3 mg of lipase at -18°C.

## Chiral HPLC-analyses

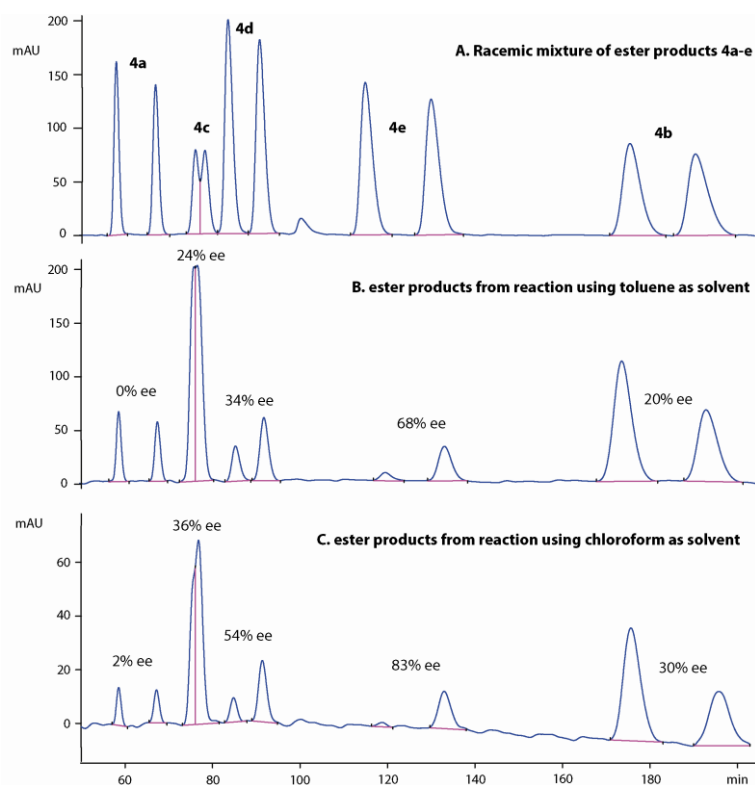

**Figure S2.** HPLC spectra. A. mixture of racemic ester compounds **4a-e**; B. mixture of ester products **4a-e** from the dynamic resolution using dry toluene as solvent; C. mixture of ester products **4a-e** from the dynamic resolution using chloroform-*d* as solvent.

NMR spectra of ester product **4a**:

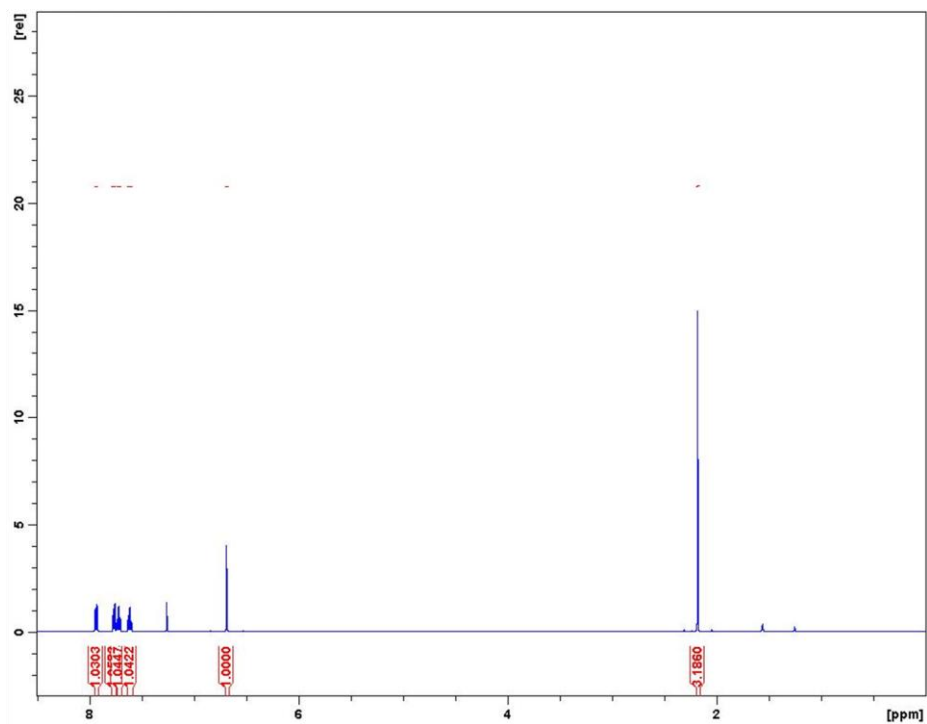

$^1\text{H}$  NMR spectrum of ester product **4a**.

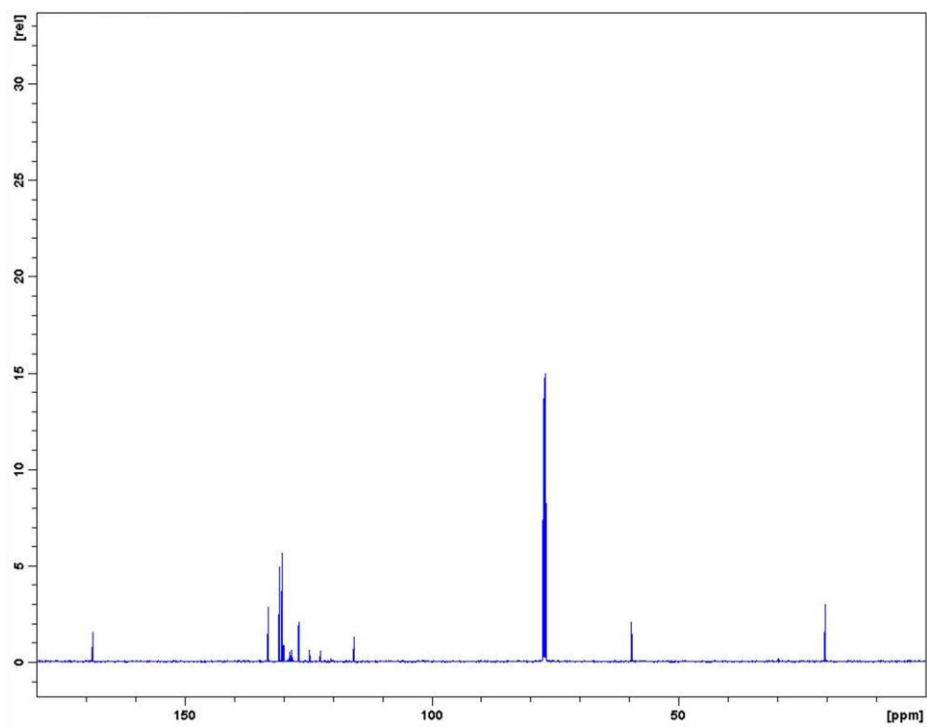

$^{13}\text{C}$  NMR spectrum of ester product **4a**.

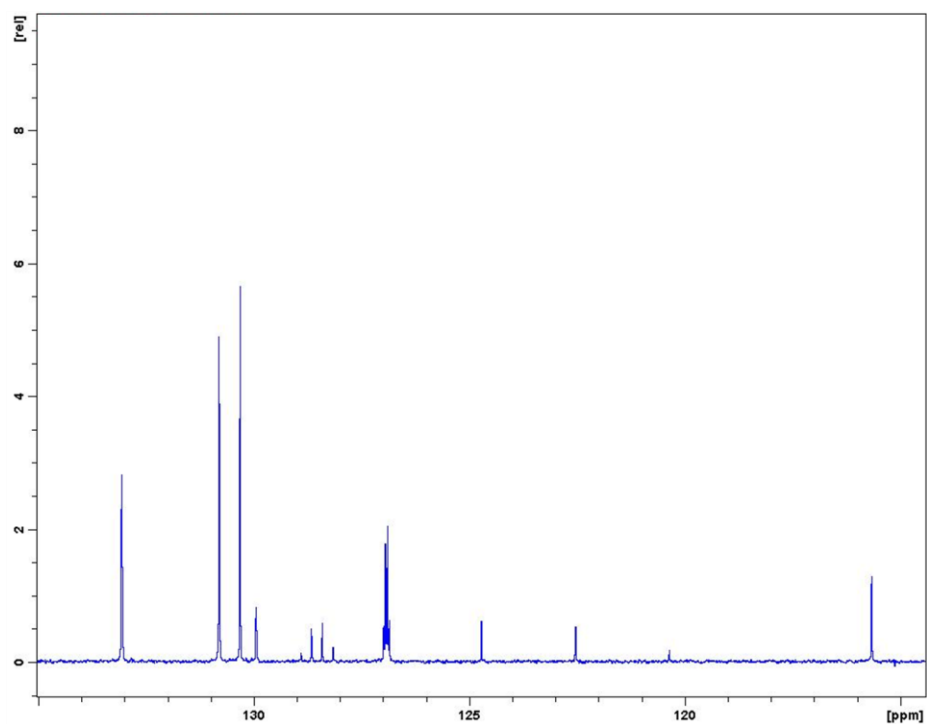

$^{13}\text{C}$  NMR spectrum (enlarged at aromatic area) of ester product **4a**.

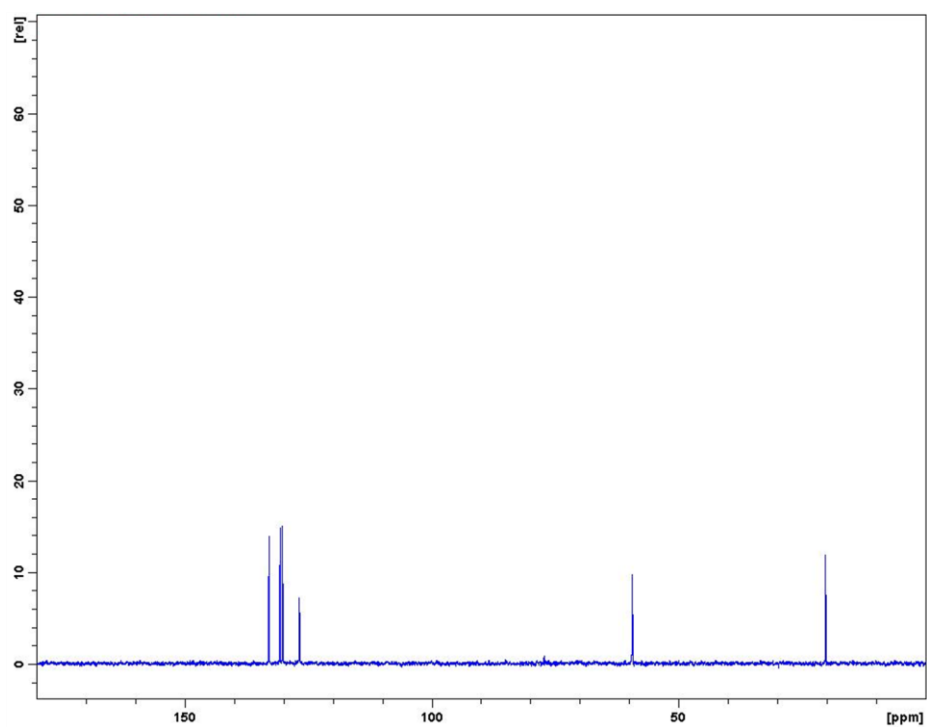

DEPT 45 NMR spectrum of **4a**.



NMR spectra of ester product **4b**:

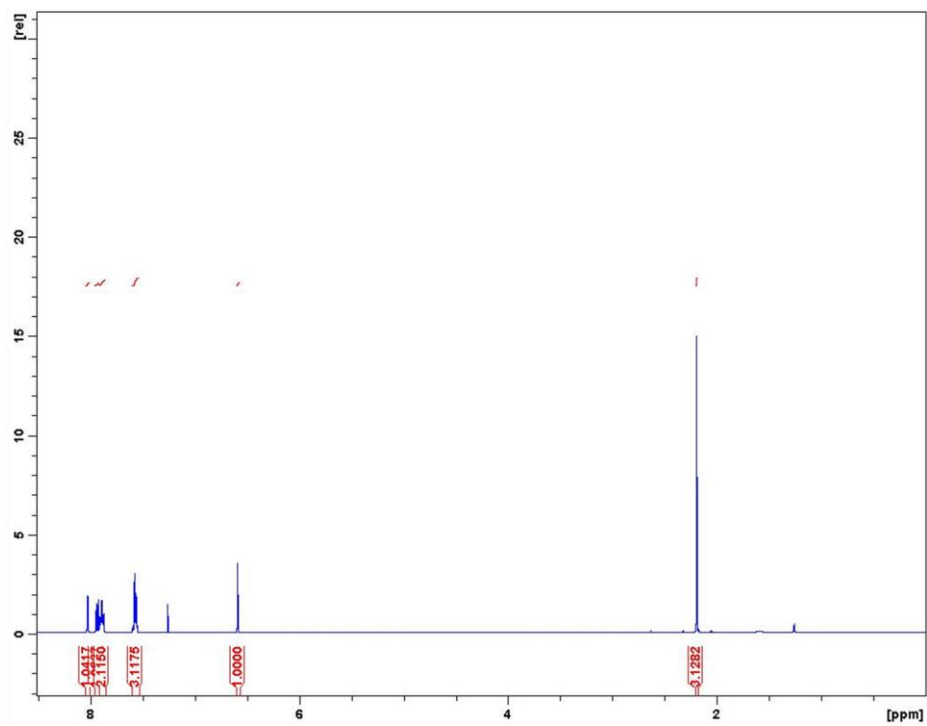

$^1\text{H}$  NMR spectrum of ester product **4b**.

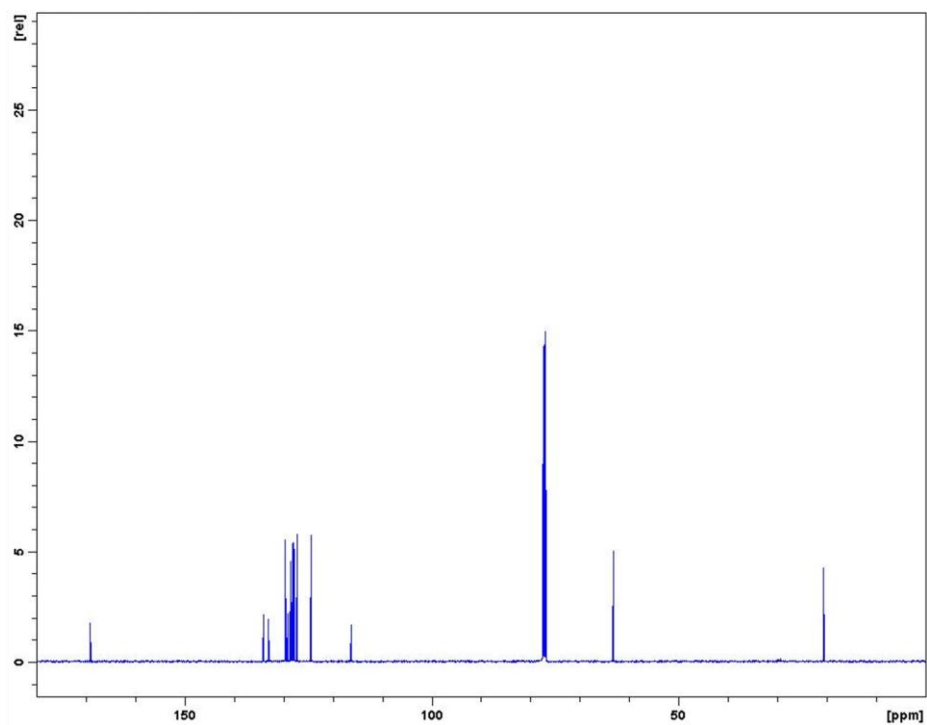

$^{13}\text{C}$  NMR spectrum of ester product **4b**.

NMR spectra of ester product **4c**:

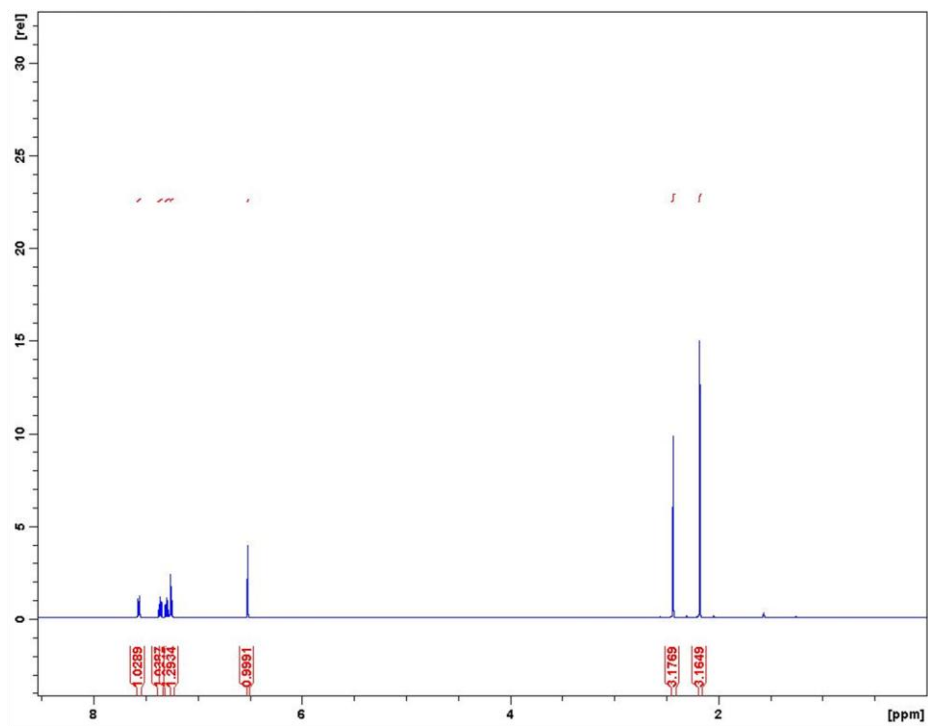

<sup>1</sup>H NMR spectrum of ester product **4c**.

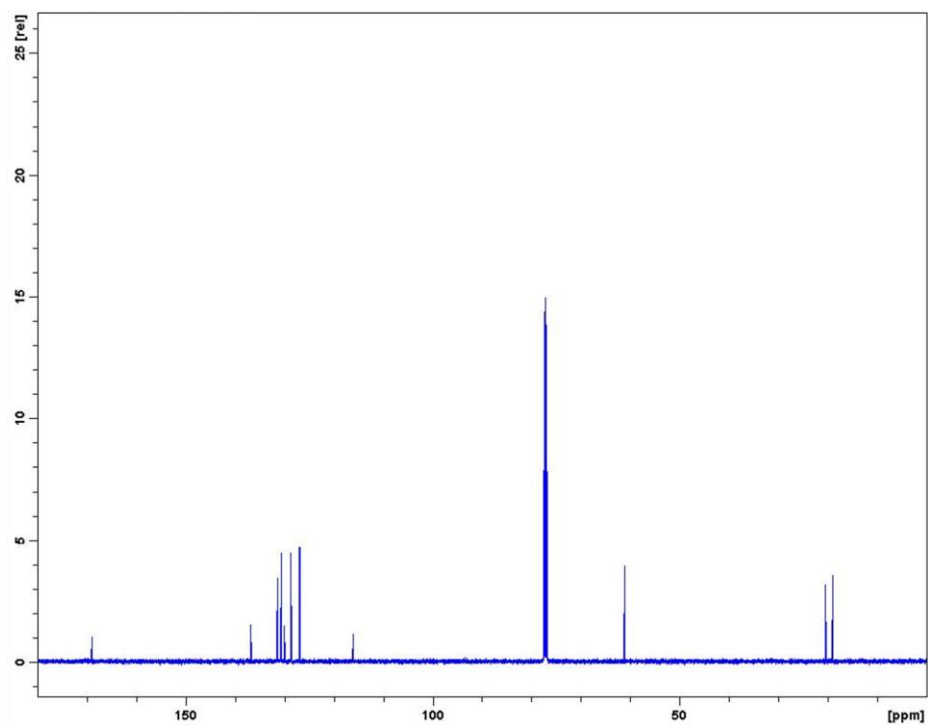

<sup>13</sup>C NMR spectrum of ester product **4c**.

NMR spectra of ester product **4d**:

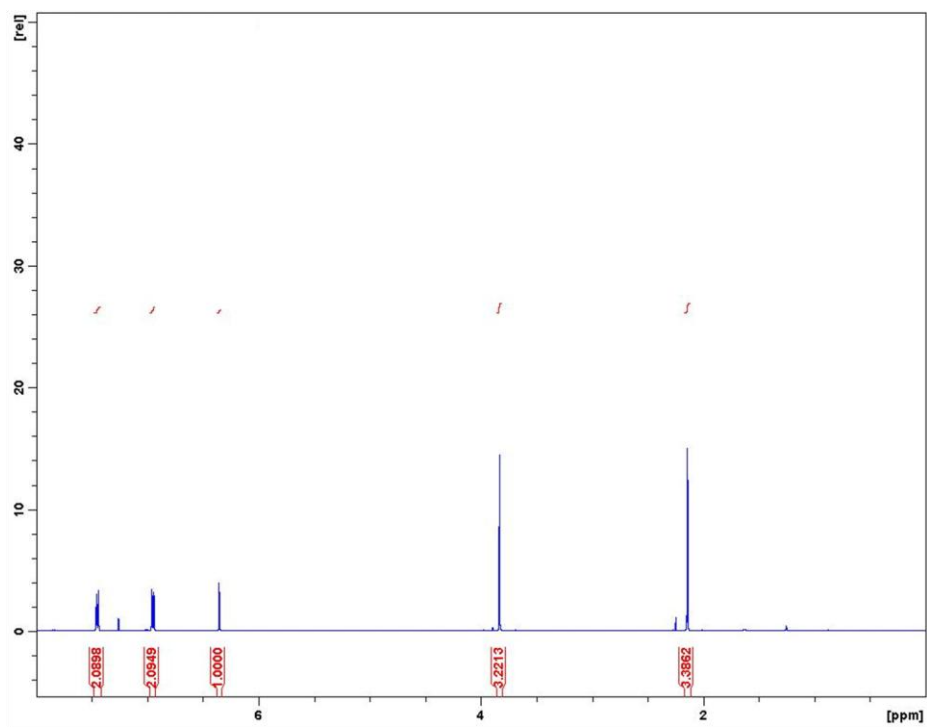

<sup>1</sup>H NMR spectrum of ester product **4d**.

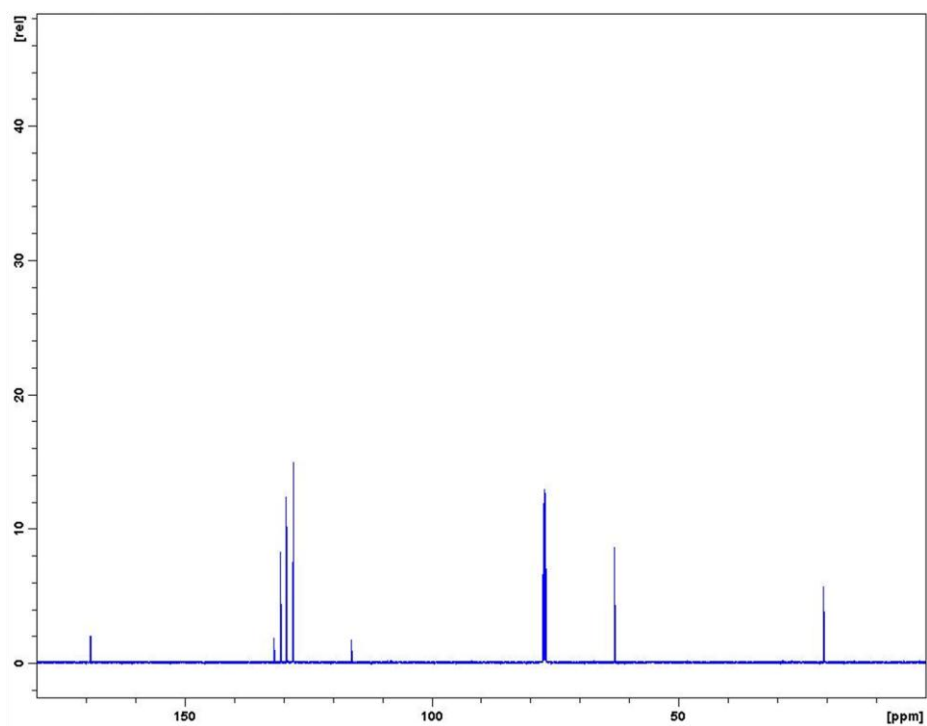

<sup>13</sup>C NMR spectrum of ester product **4d**.

NMR spectra of ester product **4e**:

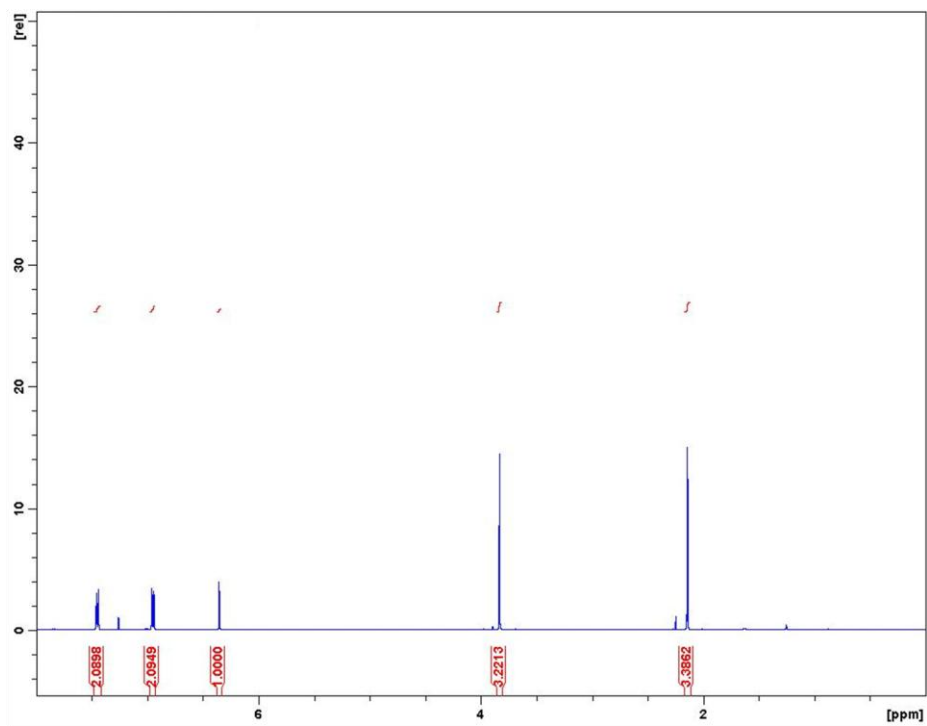

<sup>1</sup>H NMR spectrum of ester product **4e**.

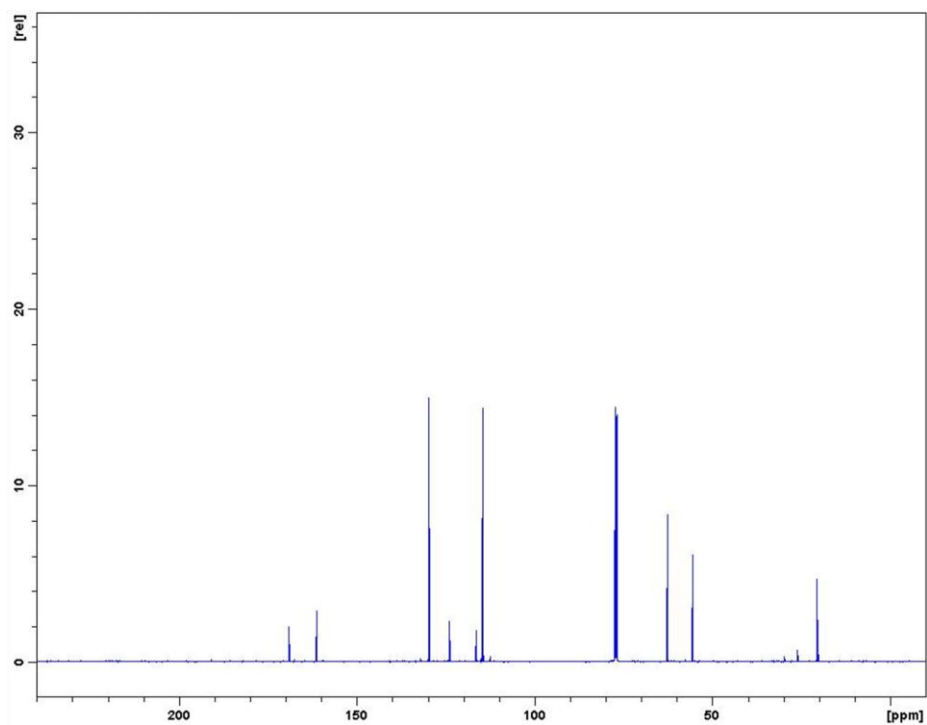

<sup>13</sup>C NMR spectrum of ester product **4e**.
